# Supplementary material for: MRE11 liberates cGAS from nucleosome sequestration during tumorigenesis
Source: PubMed Central journal article supplement (PMC10794148; doi:10.1038/s41586-023-06889-6), 2024-01-10
Supplement: 41586_2023_6889_MOESM1_ESM.pdf [file 41586_2023_6889_MOESM1_ESM.pdf]

---

**Supplementary information**

---

**MRE11 liberates cGAS from nucleosome sequestration during tumorigenesis**

---

In the format provided by the authors and unedited

## SUPPLEMENTARY INFORMATION GUIDE

### **Mre11 liberates cGAS from nucleosome sequestration during tumorigenesis**

Min-Guk Cho, Rashmi J. Kumar, Chien-Chu Lin, Joshua A. Boyer, Jamshaid A. Shahir, Katerina Fagan-Solis, Dennis A. Simpson, Cheng Fan, Christine E. Foster, Anna M. Goddard, Lynn M. Lerner, Simon W. Ellington, Qinhong Wang, Ying Wang, Alice Y. Ho, Pengda Liu, Charles M. Perou, Qi Zhang, Robert K. McGinty, Jeremy E. Purvis, Gaorav P. Gupta

Corresponding authors: [garoav\\_gupta@med.unc.edu](mailto:garoav_gupta@med.unc.edu)

**Supplementary figure 1. Raw, unprocessed images of western blots reported in this study**

**Supplementary table 1. Key resources table**

**Supplementary video 1. Live-cell imaging of cGAS recruitment to cytoplasmic dsDNA in WT and Mre11-mutant cells**

**Source Data for Figures 1-4 and Extended Data Figures 2, 3 and 5-10**

*Supplementary Videos, Source Data and Extended DATA are provided as separate files.*

# Supplementary Figure 1

## Figure 2j

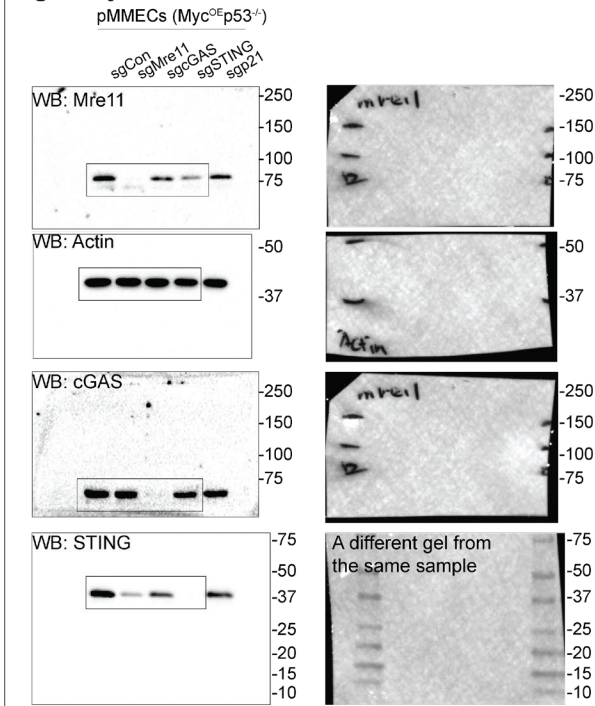

## Figure 3j

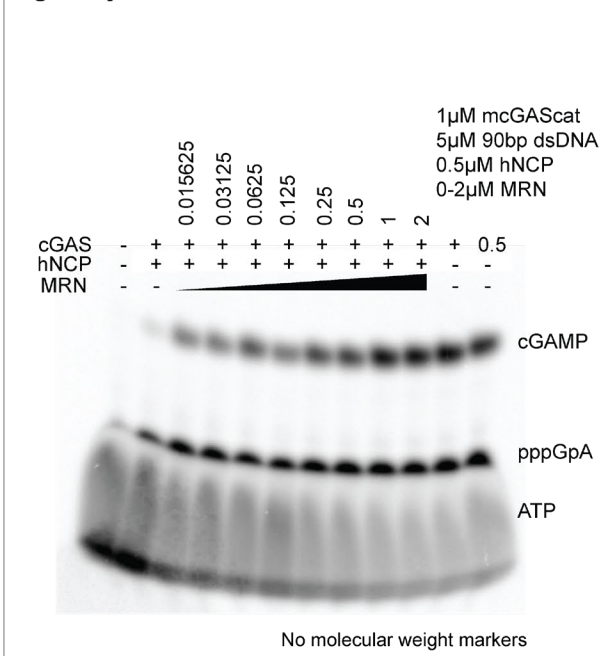

## Figure 3d

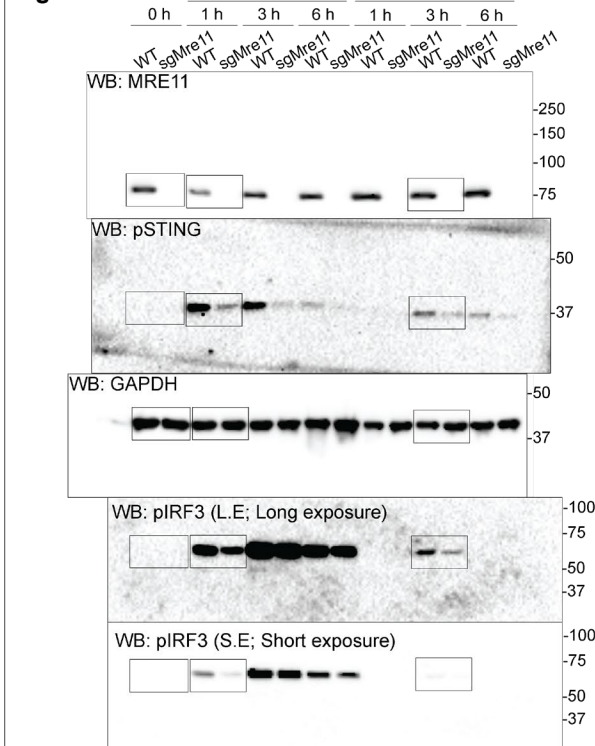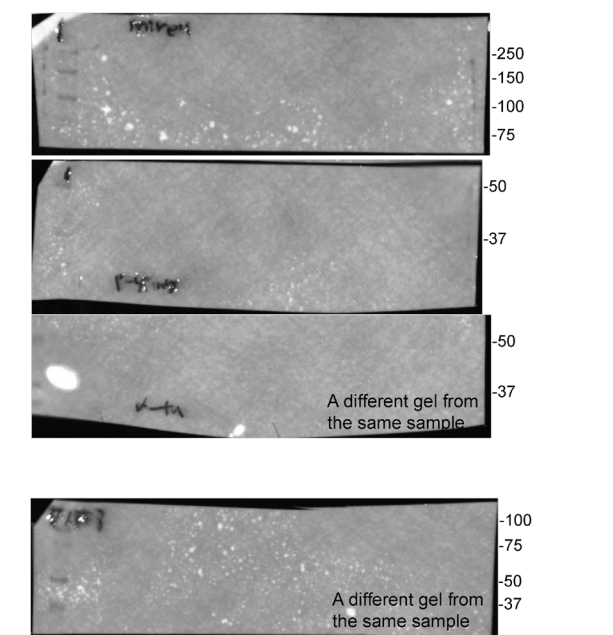

# Supplementary Figure 1

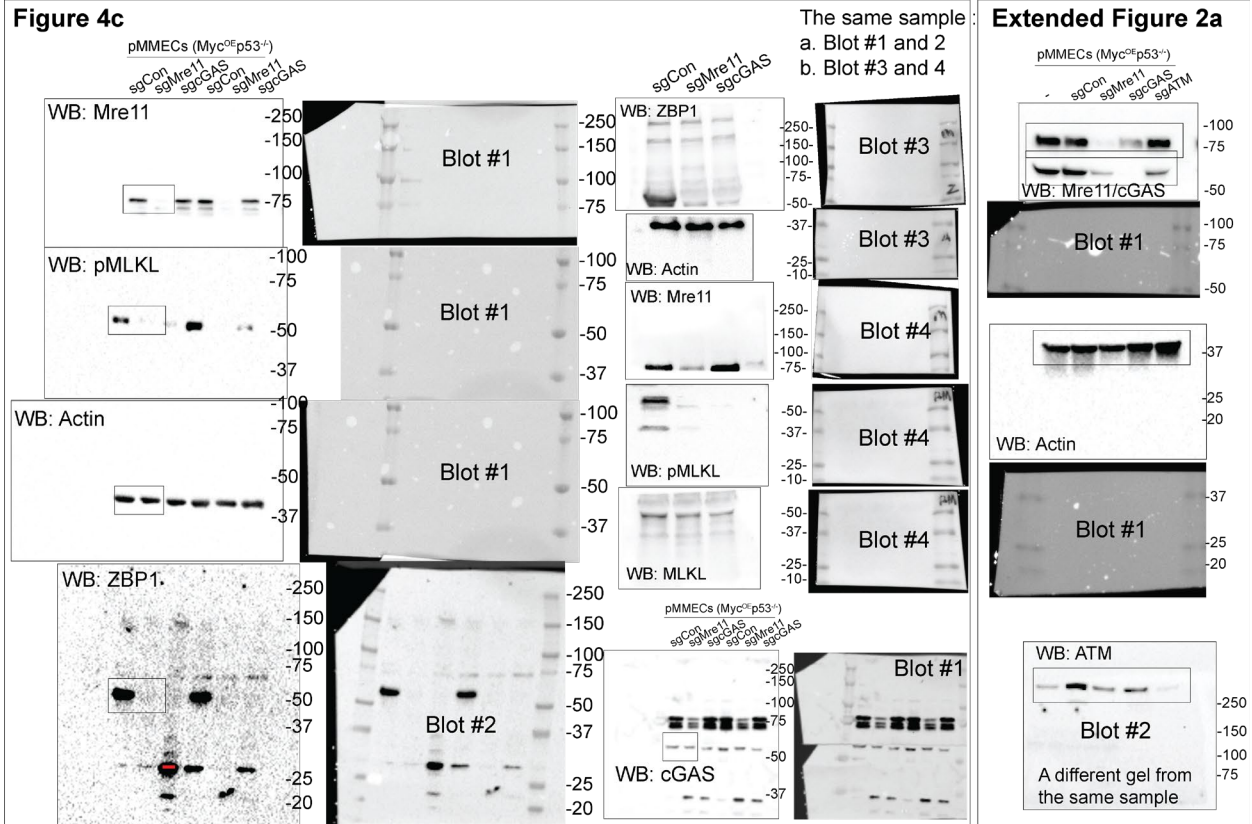

**Extended Figure 3c**  
Different gels from the same sample.

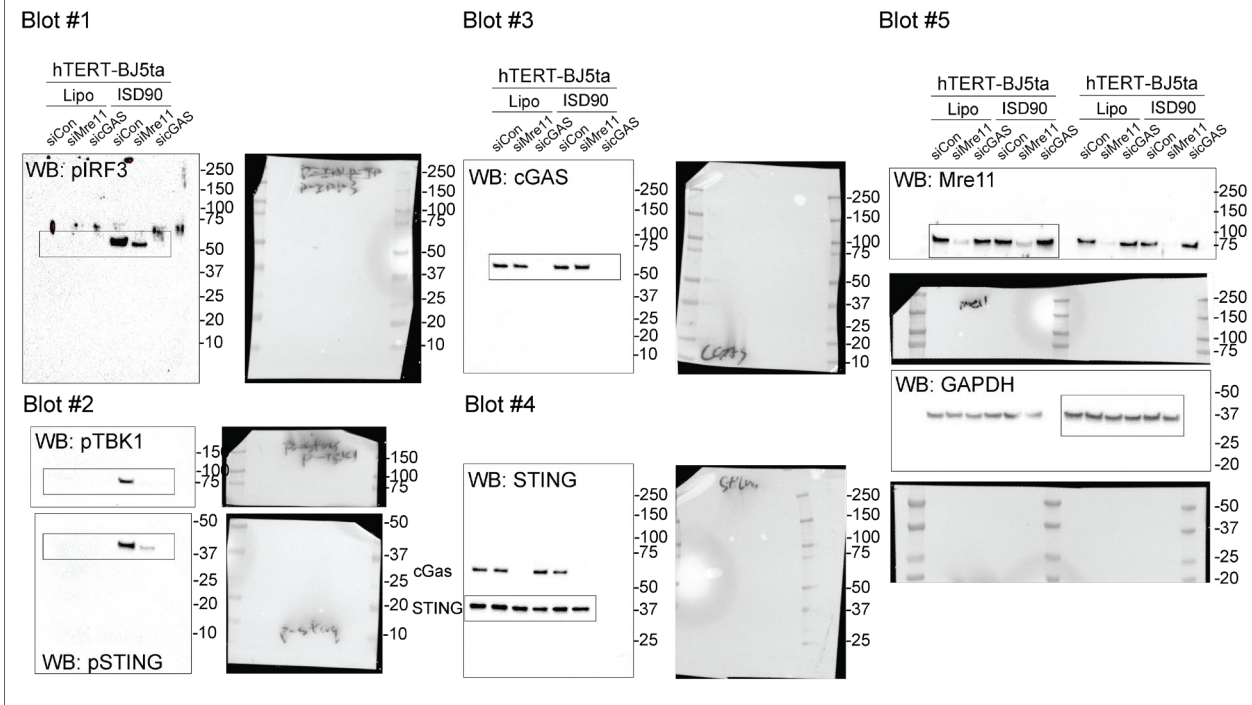

# Supplementary Figure 1

**Extended Figure 6a**

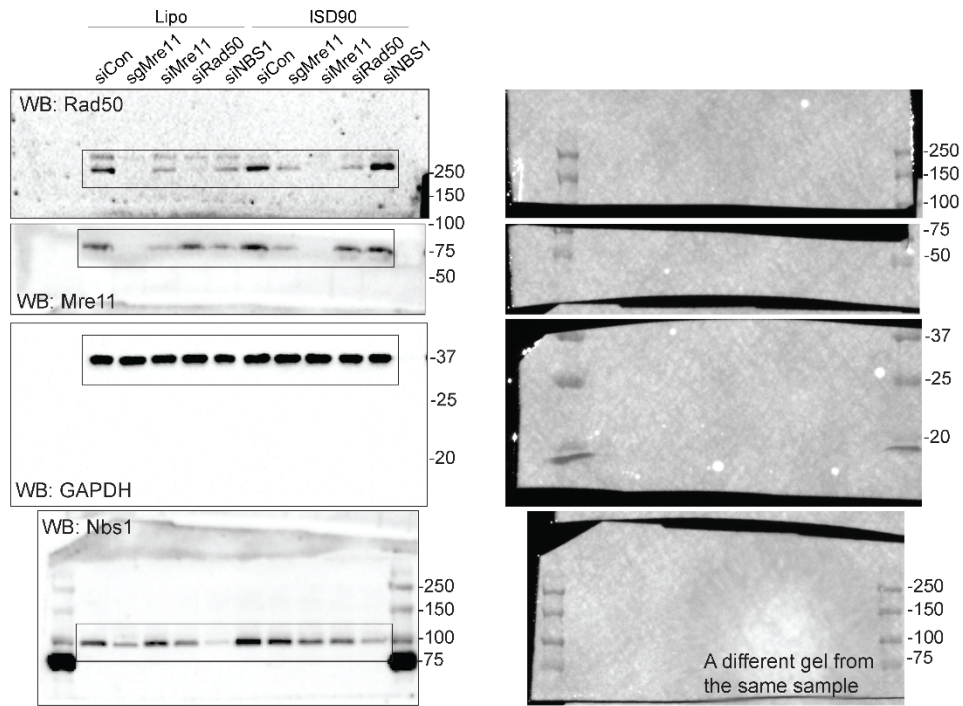

**Extended Figure 6d**

Different gels from the same sample.

Blot #1

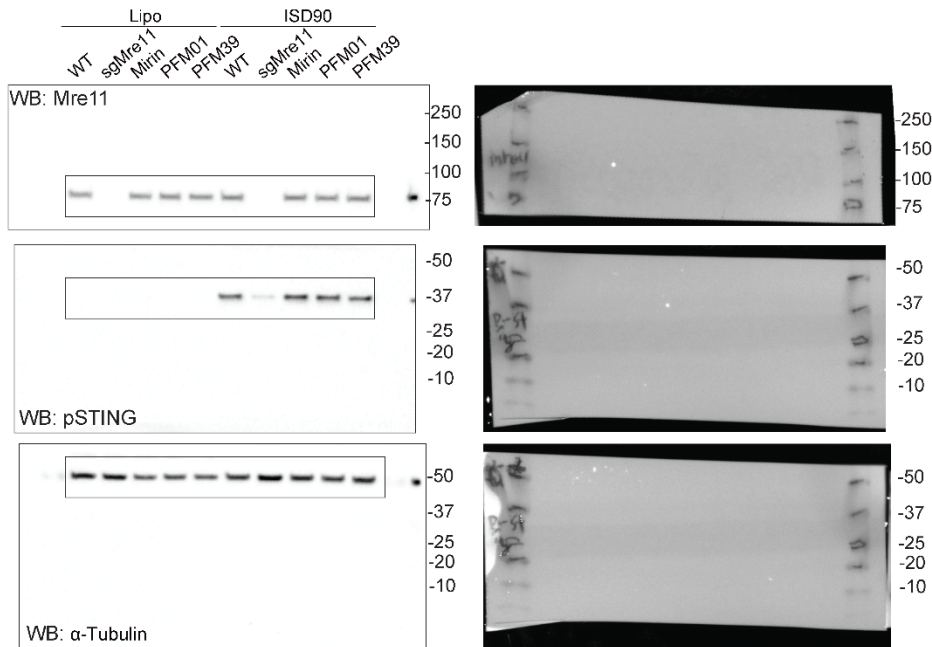

# Supplementary Figure 1

## Extended Figure 6d

Different gels from the same sample.

Blot #2

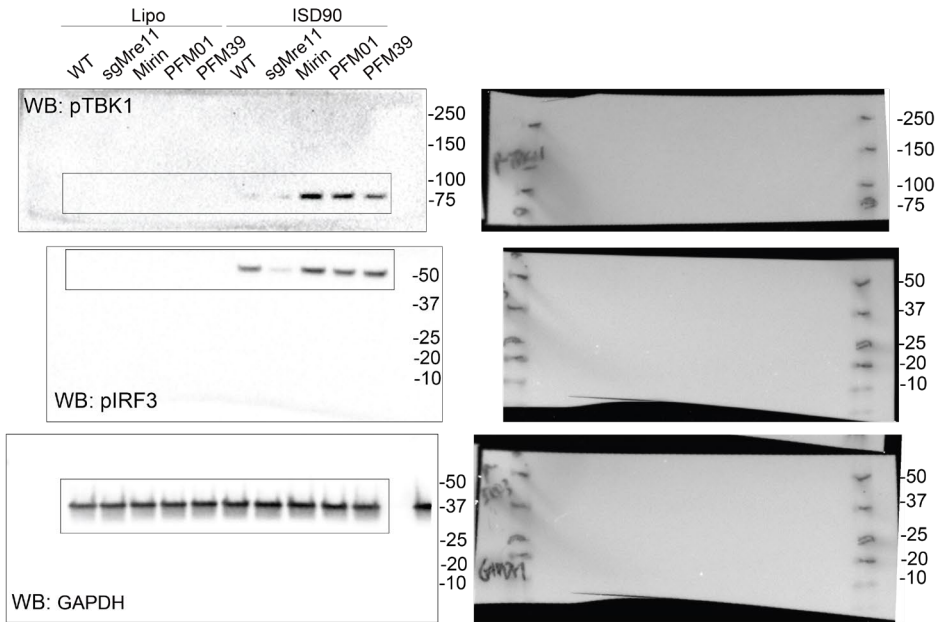

## Extended Figure 6f

Different gels from the same sample.

Blot #1

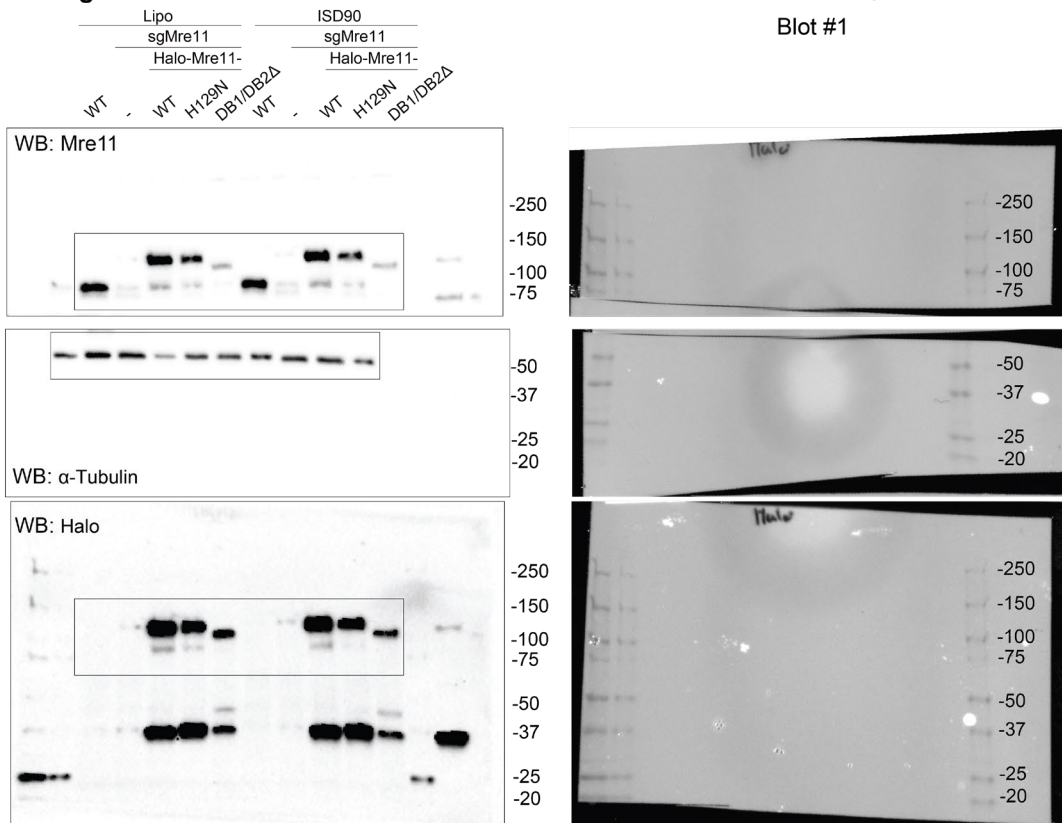

# Supplementary Figure 1

## Extended Figure 6f

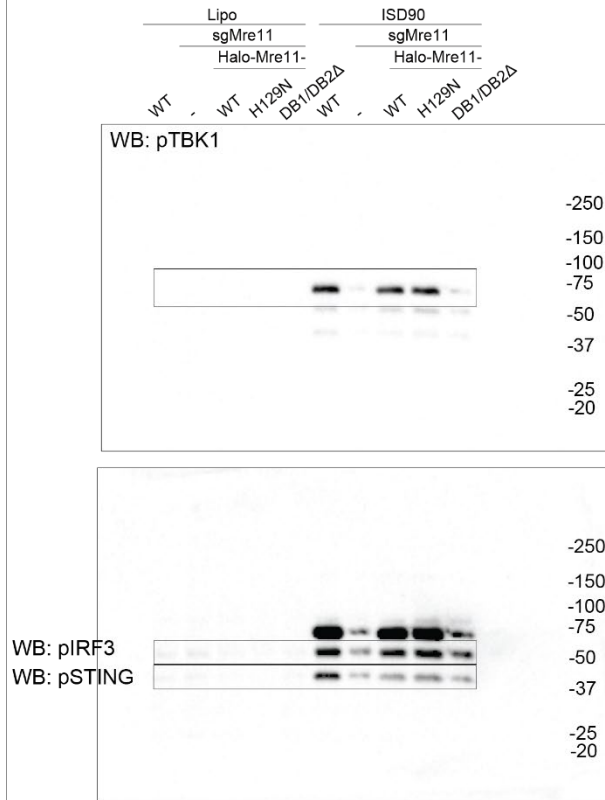

Different gels from the same sample.  
Blot #2

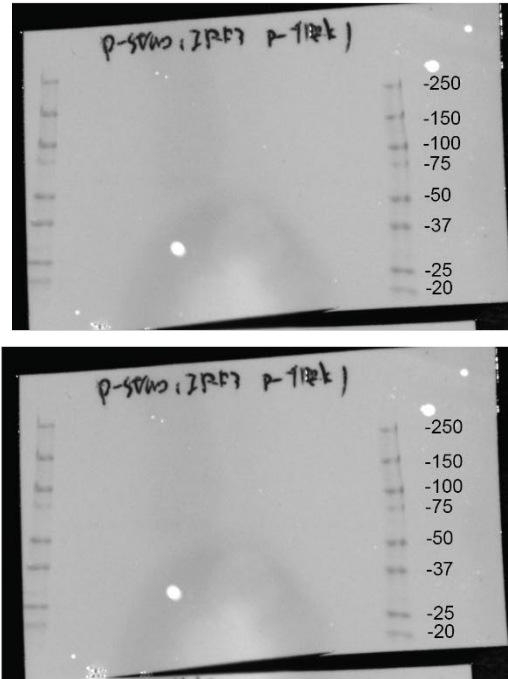

## Extended Figure 7d

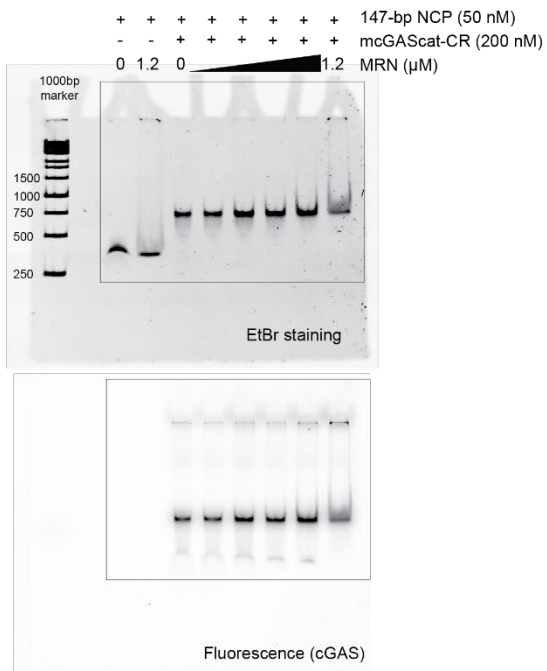

## Extended Figure 7e

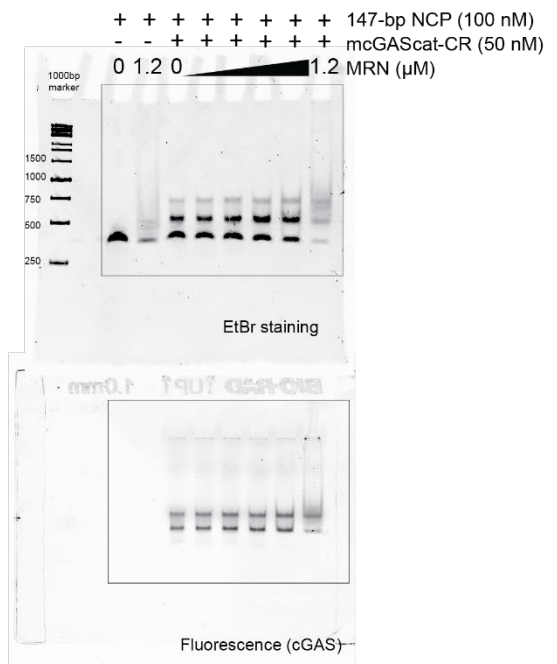

# Supplementary Figure 1

## Extended Figure 7h

|                        |   |   |   |       |      |      |      |      |     |   |   |    |     |   |
|------------------------|---|---|---|-------|------|------|------|------|-----|---|---|----|-----|---|
| 0-2 $\mu$ M MRdeadN    | - | - | - | 0.015 | 0.03 | 0.06 | 0.12 | 0.25 | 0.5 | 1 | 2 | WT | -   |   |
| 1 $\mu$ M mcGAScat     | - | + | + | +     | +    | +    | +    | +    | +   | + | + | +  | .75 | 1 |
| 0.5 $\mu$ M 147bp-hNCP | - | + | + | +     | +    | +    | +    | +    | +   | + | + | +  | -   | - |
| 5 $\mu$ M 90bp dsDNA   | + | + | + | +     | +    | +    | +    | +    | +   | + | + | +  | -   | - |

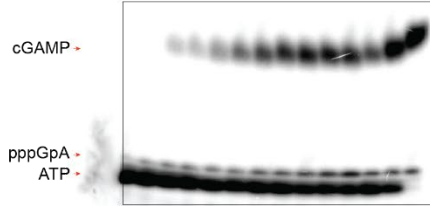

## Extended Figure 7i

|                        |   |   |   |       |      |      |      |      |     |   |   |   |
|------------------------|---|---|---|-------|------|------|------|------|-----|---|---|---|
| 0-2 $\mu$ M MRN        | - | - | - | 0.015 | 0.03 | 0.06 | 0.12 | 0.25 | 0.5 | 1 | 2 | - |
| 0.5 $\mu$ M mcGAScat   | - | + | + | +     | +    | +    | +    | +    | +   | + | + | + |
| 0.5 $\mu$ M 147bp-hNCP | - | + | + | +     | +    | +    | +    | +    | +   | + | + | - |
| 5 $\mu$ M 90bp dsDNA   | + | + | + | +     | +    | +    | +    | +    | +   | + | + | + |

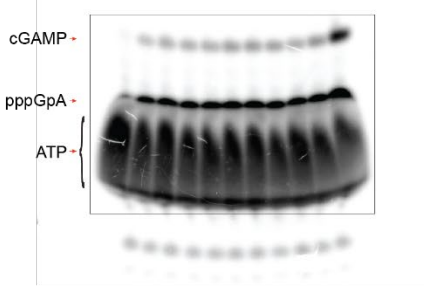

## Extended Figure 9c

|        |       |                |       |      |       |
|--------|-------|----------------|-------|------|-------|
| sgcGAS |       | sgcGAS/sgMre11 |       |      |       |
| DMSO   | DOX   | DMSO           | DOX   | DMSO | DOX   |
| WT     | R255A | WT             | R255A | WT   | R255A |

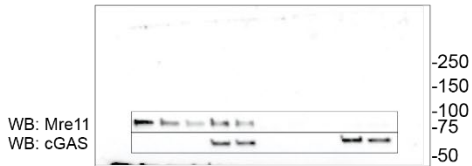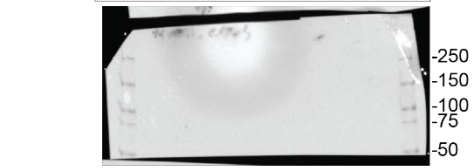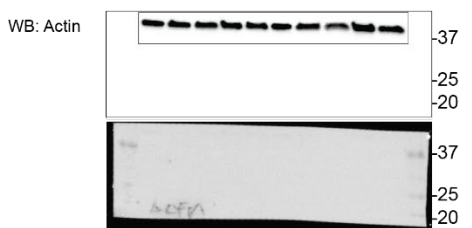

## Extended Figure 9a

|          |          |                |          |          |          |
|----------|----------|----------------|----------|----------|----------|
| sgcGAS   |          | sgcGAS/sgMre11 |          |          |          |
| mcGAS1   | hNCP v52 | mcGAS1         | hNCP v52 | mcGAS1   | hNCP v52 |
| hNCP v52 | mcGAS1   | hNCP v52       | mcGAS1   | hNCP v52 | mcGAS1   |

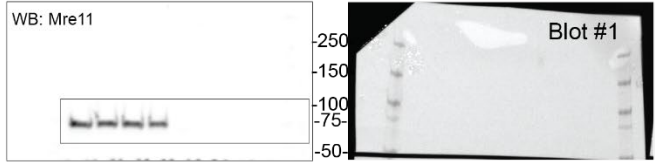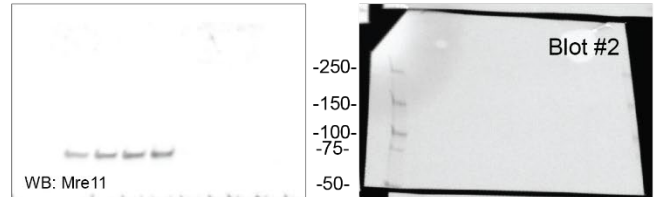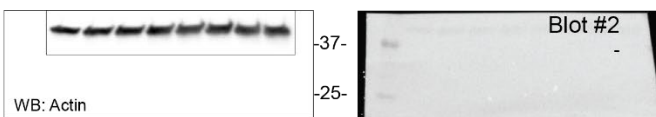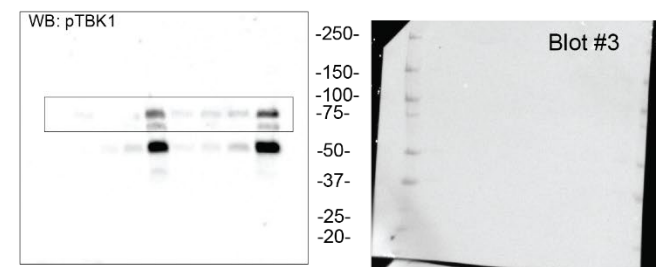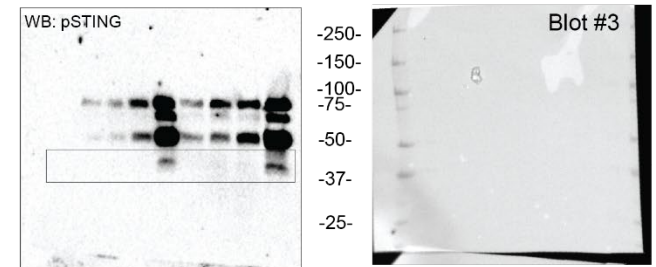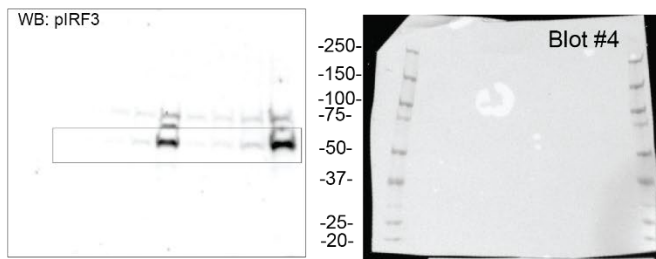

Different gels from the same sample.



# Supplementary Figure 1

## Extended Figure 10c

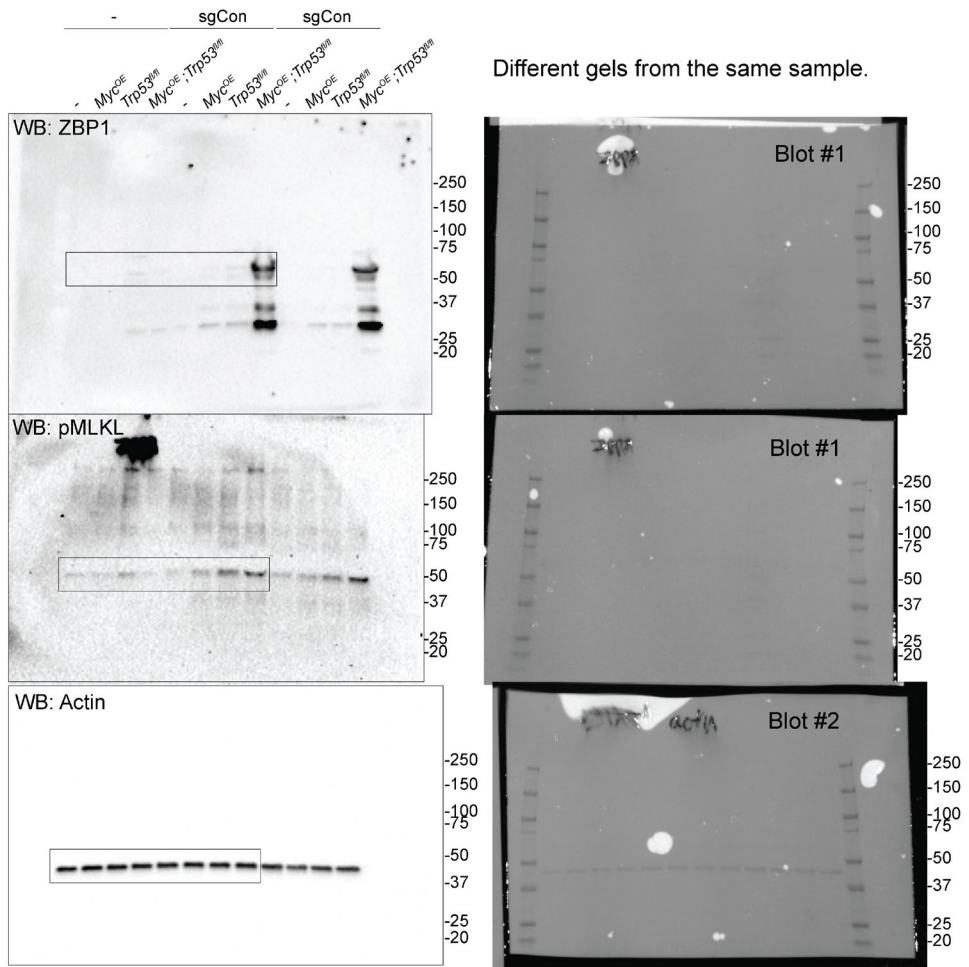

# Supplementary Figure 1

## Extended Figure 10d

|              |   | <i>Myc<sup>OE</sup>; Trp53<sup>fl/fl</sup></i> pMMECs |   |         |   |        |   |        |   |
|--------------|---|-------------------------------------------------------|---|---------|---|--------|---|--------|---|
| (25 $\mu$ M) |   | sgCon                                                 |   | sgMre11 |   | sgcGAS |   | sgZBP1 |   |
| 2'3'-cGAMP   | - | +                                                     | - | +       | - | +      | - | +      | - |

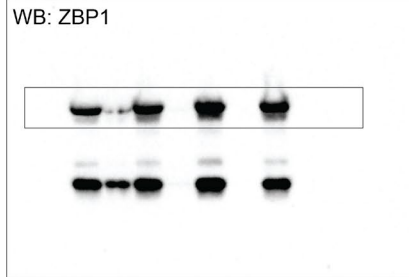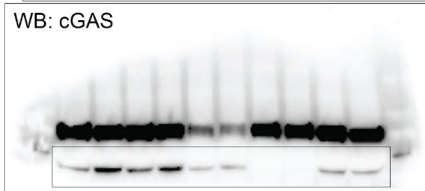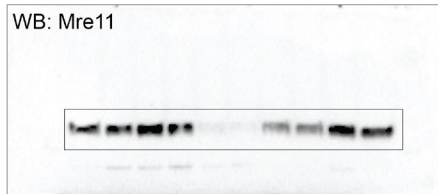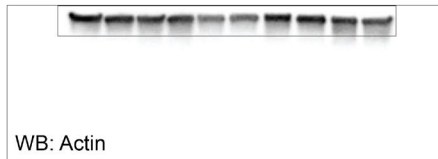

Different gels from the same sample.

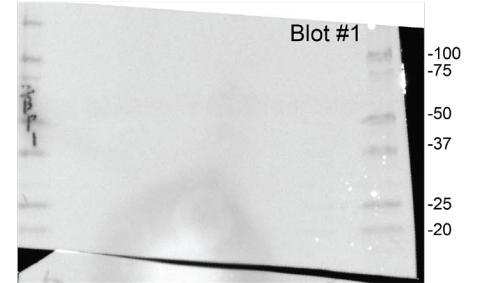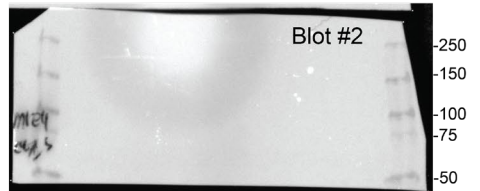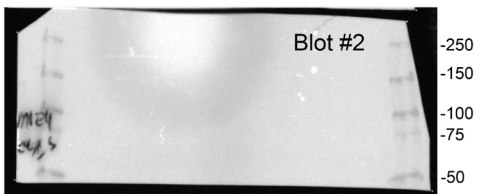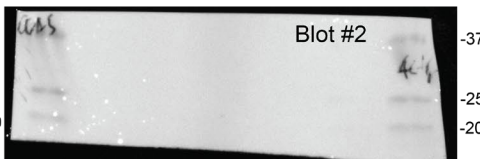

## Extended Figure 10f

*Myc<sup>OE</sup>; Trp53<sup>fl/fl</sup>* pMMECs

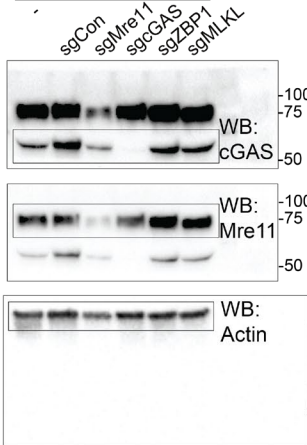

Blot #1

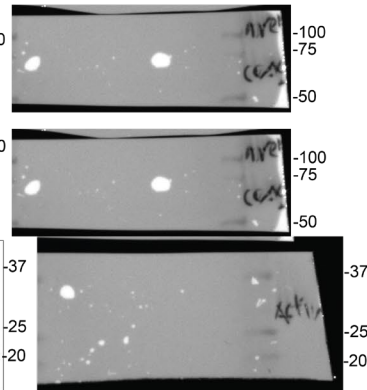

*Myc<sup>OE</sup>; Trp53<sup>fl/fl</sup>* pMMECs

sgCon sgMre11 sgcGAS sgZBP1 sgMLKL

Blot #2

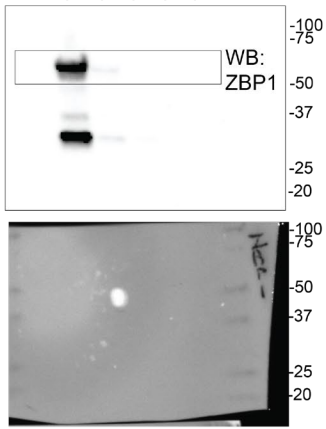

## Supplementary Table 1

### KEY RESOURCES TABLE

| REAGENT or RESOURCE                                                                             | SOURCE                    | IDENTIFIER                         |
|-------------------------------------------------------------------------------------------------|---------------------------|------------------------------------|
| <b>Antibodies</b>                                                                               |                           |                                    |
| Horse polyclonal anti-Mouse IgG, HRP-linked antibody (1:5000 for W.B)                           | Cell Signaling Technology | Cat# 7076S, RRID: AB_330924        |
| Goat polyclonal anti-Rabbit IgG, HRP linked antibody (1:5000 for W.B)                           | Cell Signaling Technology | Cat# 7074S, RRID: AB_2099233       |
| Goat polyclonal anti-Hamster IgG, HRP-linked antibody (1:5000 for W.B)                          | Thermo Fisher Scientific  | Cat# PA1-29626, RRID: AB_10985385  |
| Rabbit polyclonal anti-Mre11 antibody (1:1000 for W.B)                                          | Novus Biologicals         | Cat# NB100-142, RRID: AB_10077796  |
| Mouse monoclonal anti- $\beta$ -Actin antibody, unconjugated, clone AC-15 (1:5,000 for W.B)     | Sigma-Aldrich             | Cat# A1978, RRID: AB_476692        |
| Rabbit monoclonal anti-cGAS antibody (D3O8O), Mouse Specific (1:1000 for W.B, 1:500 for ICC)    | Cell Signaling Technology | Cat# 31659S, RRID: AB_2799008      |
| Rabbit monoclonal anti-cGAS antibody (D1D3G) (1:1000 for W.B, 1:500 for ICC, 1:4000 for IF)     | Cell Signaling Technology | Cat# 15102S, RRID: AB_2732795      |
| Mouse monoclonal anti- $\alpha$ Tubulin antibody (B-7) (1:1000 for W.B, 1:500 for ICC)          | Santa Cruz Biotechnology  | Cat#SC-5286, RRID: AB_628411       |
| Rabbit monoclonal anti-phospho-Histone H2A.X (Ser139) (20E3), (1:3000 for IF)                   | Cell Signaling Technology | Cat# 9718S, RRID: AB_2118009       |
| Rabbit polyclonal anti-STING/TMEM173 antibody (1:1000 for W.B)                                  | Novus Biologicals         | Cat# NBP2-24683, RRID: AB_2868483  |
| Rabbit monoclonal anti-IRF3 (Ser386) antibody [EPR2346] (1:1000 for W.B)                        | Abcam                     | Cat# ab76493, RRID: AB_1523836     |
| Rabbit monoclonal anti-STING (Ser366) antibody (D7C3S) (1:1000 for W.B)                         | Cell Signaling Technology | Cat# 19781, RRID: AB_2737062       |
| Rabbit monoclonal anti-TBK1/NAK (Ser172) antibody (D52C2) (1:1000 for W.B)                      | Cell Signaling Technology | Cat# 5483, RRID: AB_10693472       |
| Mouse monoclonal anti-GAPDH antibody (G-9) (1:1000 for W.B)                                     | Santa Cruz Biotechnology  | Cat# sc-365062, RRID: AB_10847862  |
| Rabbit polyclonal anti-Rad50 antibody (1:1000 for W.B)                                          | Novus Biologicals         | Cat# NBP2-20054, RRID: AB_2894913  |
| Mouse monoclonal anti-NBS1 antibody (1:1000 for WB)                                             | Novus Biologicals         | Cat# NB100-221, RRID: AB_10001212  |
| Horse polyclonal anti-Mouse IgG, HRP-linked antibody (1:5000)                                   | Cell Signaling Technology | Cat# 7076S, RRID: AB_330924        |
| Goat polyclonal anti-Rabbit IgG, HRP linked antibody (1:5000)                                   | Cell Signaling Technology | Cat# 7074S, RRID: AB_2099233       |
| Goat polyclonal anti-Hamster IgG (H+L) secondary antibody, HRP (1:5000)                         | Thermo Fisher Scientific  | Cat# PA1-29626, RRID: AB_10985385  |
| Mouse monoclonal anti-HaloTag® protein antibody (1:1000 for WB, 1:500 for I.C.C)                | Promega                   | Cat# G9211, RRID: AB_2688011       |
| Rabbit monoclonal anti-MLKL (phospho S345) [EPR9515(2)] antibody (1:500 for ICC, 1:1000 for WB) | Abcam                     | Cat# ab196436, RRID: AB_2687465    |
| Mouse monoclonal anti-MLKL antibody (1:1000 for WB)                                             | Proteintech               | Cat# 66675-1-Ig, RRID: AB_2882029  |
| Mouse monoclonal anti-ZBP1 (Zippy-1) antibody (1:1000 for WB)                                   | AdipoGen                  | Cat# AG-20B-0010, RRID: AB_2490191 |

|                                                                                                                                       |                           |                                      |
|---------------------------------------------------------------------------------------------------------------------------------------|---------------------------|--------------------------------------|
| Rabbit monoclonal anti-ATM (D2E2) (1:1000 for WB)                                                                                     | Cell Signaling Technology | Cat# 2873S<br>RRID: AB_2062659       |
| Goat anti-Rabbit IgG (H+L) Secondary Antibody, Alexa Fluor 488                                                                        | Thermo Fisher Scientific  | Cat# A11034<br>RRID: AB_2576217      |
| Goat anti Rabbit IgG (H+L) Secondary Antibody, Alexa Fluor 594                                                                        | Thermo Fisher Scientific  | Cat# A11037<br>RRID: AB_2534095      |
| F(ab') <sub>2</sub> -Goat anti-Rabbit IgG (H+L) Cross-Adsorbed Secondary Antibody, Alexa Fluor 633 (1:500 for ICC)                    | Thermo Fisher Scientific  | Cat# A21072<br>RRID: AB_1500777      |
| Cy <sup>TM</sup> 3 AffiniPure Donkey Anti-Mouse IgG (H+L) (1:500 for ICC)                                                             | Jackson ImmunoResearch    | Cat# 715-165-151<br>RRID: AB_2315777 |
| Cy <sup>TM</sup> 5 AffiniPure Goat Anti-Rabbit IgG (H+L) (1:500 for ICC)                                                              | Jackson ImmunoResearch    | Cat# 111-175-144<br>RRID: AB_2338013 |
| Streptavidin, Alexa Fluor <sup>TM</sup> 488 Conjugate (1:500 for ICC)                                                                 | Thermo Fisher Scientific  | Cat# S32354,<br>RRID: AB_2315383     |
| Sheep Polyclonal anti-Z-DNA (1:500 for ICC)                                                                                           | Novous Biologicals        | Cat# NB100-749<br>RRID: AB_10003363  |
| Donkey anti-Sheep IgG (H+L) Cross-Adsorbed Secondary Antibody, Alexa Fluor <sup>TM</sup> 594 Invitrogen <sup>TM</sup> (1:500 for ICC) | Invitrogen                | Cat# A-11016<br>RRID: AB_2534083     |
| <b>Bacterial and Virus Strains</b>                                                                                                    |                           |                                      |
| Endura DUOs Electrocompetent Cells                                                                                                    | Lucigen                   | 60242-2                              |
| Endura Competent Cells                                                                                                                | Lucigen                   | 60241-2                              |
| Invitrogen <sup>TM</sup> MAX Efficiency <sup>TM</sup> DH10Bac Competent Cells                                                         | Thermo Fisher Scientific  | 10361012                             |
| One Shot <sup>reg</sup> ; ccdB Survival <sup>trade</sup> ; 2 T1R Competent cells                                                      | Invitrogen                | A10460                               |
| Subcloning Efficiency <sup>TM</sup> DH5 $\alpha$ Competent Cells                                                                      | Thermo fisher scientific  | 18265017                             |
| <b>Chemicals, Peptides, and Recombinant Proteins</b>                                                                                  |                           |                                      |
| Liberase Blendzyme 2                                                                                                                  | Roche                     | 11988425001                          |
| EpiCult-B Mouse Medium kit                                                                                                            | Stem Cell Technologies    | 05610                                |
| DNase I                                                                                                                               | Worthington               | LS002060                             |
| Dispase (5 U/mL)                                                                                                                      | Stem Cell Technologies    | 07913                                |
| LA7 medium                                                                                                                            | Thermo Fisher Scientific  | 11965084                             |
| Insulin                                                                                                                               | VWR                       | 11061-68-0                           |
| 150 U/mL Collagenase type 3                                                                                                           | Worthington               | LS004182                             |
| Cultrex 3D Culture Matrix Rat Collagen I                                                                                              | Fisher Scientific         | 344702001                            |
| Trypsin EDTA                                                                                                                          | Gibco                     | 25200-056                            |
| Bovine Serum Albumin                                                                                                                  | Fisher Scientific         | BP9706-160                           |
| Carbenicillin                                                                                                                         | Fisher Scientific         | BP26481                              |
| Ampicillin                                                                                                                            | Fisher Scientific         | B1760-25                             |
| 4',6-Diamidine-2'-phenylindole dihydrochloride (DAPI)                                                                                 | Sigma-Aldrich             | 10236276001; CAS: 28718-90-3         |
| C-176 (STING inhibitor) 10mM/1mL                                                                                                      | Selleck Chemicals         | S6575; CAS: 1032350-13-2             |
| 2'3'-cGAMP, 1 mg                                                                                                                      | Invivogen                 | tlrl-nacga23-1                       |
| Necrosulfonamide (NSA; MLKL inhibitor)                                                                                                | Selleck Chemicals         | S8251; CAS: 1360614-48-7             |
| HS-1371 (RIPK3 inhibitor)                                                                                                             | Selleck Chemicals         | S8775; CAS: 2158197-70-5             |
| Polyethylenimine, Linear (MW 25,000)                                                                                                  | Polysciences              | 23966-2                              |

|                                                                  |                              |                            |
|------------------------------------------------------------------|------------------------------|----------------------------|
| Hexadimethrine bromide/polybrene                                 | Sigma-Aldrich                | 107689; CAS:<br>28728-55-4 |
| Janelia Fluor® 646 HaloTag® Ligands                              | Promega                      | GA1120                     |
| Bond Dewax Solution                                              | Leica                        | AR9222                     |
| Bond Wash Solution                                               | Leica                        | AR9590                     |
| Bond-epitope retrieval solution 2 pH9.0                          | Leica                        | AR9640                     |
| Novolink Polymer                                                 | Leica                        | RE7161                     |
| TSA Cyanine 5 (Cy5)                                              | Akoya Biosciences            | FP1117                     |
| TSA Cyanine 3 (Cy3)                                              | Akoya Biosciences            | FP1046                     |
| Bond-epitope retrieval solution 1 pH 6.0                         | Leica                        | AR9961                     |
| 2x Laemmli sample buffer                                         | Bio-Rad                      | 161-0737                   |
| Sf-900™ III SFM                                                  | Thermo Fisher Scientific     | 12658019                   |
| cOmplete EDTA-free protease inhibitor cocktail                   | Sigma-Aldrich                | 11873580001                |
| 3X FLAG® Peptide                                                 | Sigma-Aldrich                | F4799                      |
| Hoechst 33258                                                    | Invitrogen                   | H3569                      |
| Mirin                                                            | Sigma-Aldrich                | M9948                      |
| PFM39                                                            | Sigma-Aldrich                | SML1839                    |
| PFM01                                                            | Sigma-Aldrich                | SML1735                    |
| BP Clonase II Enzyme Mix                                         | Thermo Fisher Scientific     | 11789100                   |
| LR Clonase II Enzyme Mix                                         | Thermo Fisher Scientific     | 11791100                   |
| <i>Dpn1</i>                                                      | NEB                          | R0176S                     |
| Doxycycline hyclate                                              | Sigma-Aldrich                | D9891                      |
| Normocin™                                                        | Invivogen                    | ant-nr-05                  |
| QUANTI-Luc                                                       | Invivogen                    | rep-qlc1                   |
| SpCas9 2NLS Nuclease                                             | Synthego                     | N/A                        |
| Purified 3xFLAG® peptide                                         | Sigma-Aldrich                | F4799                      |
| Inorganic Pyrophosphatase (IPP)                                  | Sigma-Aldrich                | I1643                      |
| ATP [ $\alpha$ - <sup>32</sup> P]                                | PerkinElmer                  | NEG003X250UC               |
| Biotin-maleimide                                                 | Sigma-Aldrich                | B1267                      |
| Atto 647N maleimide                                              | Sigma-Aldrich                | 05316-1MG-F                |
| LANCE Ultra ULight-anti-6xHis                                    | PerkinElmer                  | TRF0134-M                  |
| <b>Critical Commercial Assays</b>                                |                              |                            |
| PlasmoTest                                                       | Invitrogen                   | REP-PT1                    |
| RNeasy Plus Mini Kit                                             | Qiagen                       | 74136                      |
| Maxima First Strand cDNA Synthesis Kit for RT-qPCR, with dsDNase | Thermo Fisher Scientific     | FERK1672                   |
| Fast SYBR™ Green Master Mix                                      | Thermo Fisher Scientific     | 4385617                    |
| Q5® Hot Start High-Fidelity 2X Master Mix                        | NEB                          | M0494S                     |
| NEBuilder® HiFi DNA Assembly Master Mix                          | NEB                          | E2621L                     |
| HIFI DNA assembly Master Mix                                     | NEB                          | E2611S                     |
| 2'3'-cGAMP ELISA Kit                                             | Cayman Chemical Company      | Item No. 501700            |
| EdU-Click 594                                                    | Sigma-Aldrich                | BCK-EDU594                 |
| <b>Experimental Models: Cell Lines</b>                           |                              |                            |
| HEK 293T/17                                                      | ATCC                         | ATCC® CRL-11268            |
| WT MEFs                                                          | Gift from John Petrini, Ph.D | N/A                        |
| ATLD/ATLD MEFs                                                   | Gift from John Petrini, Ph.D | N/A                        |
| BJ-5ta                                                           | ATCC                         | CRL-4001                   |
| MDA-MB-231                                                       | ATCC                         | CRM-HTB-26                 |
| sgMREe11 MDA-MB-231                                              | In this paper                | N/A                        |

|                                                                                                                                                                   |                                                   |             |
|-------------------------------------------------------------------------------------------------------------------------------------------------------------------|---------------------------------------------------|-------------|
| sgMRE11 + Halo-hMRE11-WT MDA-MB-231                                                                                                                               | In this paper                                     | N/A         |
| sgMRE11 + RFP-cGAS MDA-MB-231                                                                                                                                     | In this paper                                     | N/A         |
| sgMRE11 + RFP-cGAS + Halo-hMRE11 MDA-MB-231                                                                                                                       | In this paper                                     | N/A         |
| sgMre11 + Halo-hMre11-H129N MDA-MB-231                                                                                                                            | In this paper                                     | N/A         |
| sgMre11 + Halo-hMRE11-DB1 $\Delta$ /DB2 $\Delta$ MDA-MB-231                                                                                                       | In this paper                                     | N/A         |
| sgcGAS MDA-MB-231                                                                                                                                                 | In this paper                                     | N/A         |
| sgMre11 + sgcGAS MDA-MB-231                                                                                                                                       | In this paper                                     | N/A         |
| sgcGAS + cGAS-WT MDA-MB-231                                                                                                                                       | In this paper                                     | N/A         |
| sgcGAS + cGAS-R255A MDA-MB-231                                                                                                                                    | In this paper                                     | N/A         |
| sgMre11 + sgcGAS + cGAS-WT MDA-MB-231                                                                                                                             | In this paper                                     | N/A         |
| sgMre11 + sgcGAS + cGAS-R255A MDA-MB-231                                                                                                                          | In this paper                                     | N/A         |
| Lucia™ ISG Cells                                                                                                                                                  | Invivogen                                         | rawl-isg    |
| Sf9 cells in Sf-900™ II SFM                                                                                                                                       | Thermo Fisher Scientific                          | 11496015    |
| <b>Experimental Models: Organisms/Strains</b>                                                                                                                     |                                                   |             |
| FVB.129P2- <i>Trp53</i> <sup>tm1Brn</sup> /Nci ( <i>Mus musculus</i> )<br>Referred to in this manuscript as “ <i>Trp53</i> <sup>FL</sup> ”                        | Frederick National Laboratory for Cancer Research | 01XC2       |
| C57BL/6N- <i>Gt(ROSA)26Sor</i> <sup>tm13(CAG-MYC,-CD2*)Rsky</sup> /J ( <i>Mus musculus</i> )<br>Referred to in this manuscript as “ <i>R26</i> <sup>MycOE</sup> ” | The Jackson Laboratory                            | 020458      |
| B6;129- <i>Gt(ROSA)26Sor</i> <sup>tm1(CAG-cas9*,-EGFP)Fezh</sup> /J ( <i>Mus musculus</i> )<br>Referred to in this manuscript as “ <i>R26</i> <sup>Cas9</sup> ”   | The Jackson Laboratory                            | 024857      |
| NOD.129S7(B6)- <i>Rag1</i> <sup>tm1Mom</sup> /J ( <i>Mus musculus</i> )<br>Referred to in this manuscript as “ <i>NRG</i> ”                                       | The Jackson Laboratory                            | 003729      |
| <b>Oligonucleotides</b>                                                                                                                                           |                                                   |             |
| Primer: Mouse IFIT1<br>Forward: TACAGGCTGGAGTGTGCTGAGA<br>Reverse: CTCCACTTTTCAGAGCCTTCGCA                                                                        | Eton Bioscience                                   | N/A         |
| Primer: Mouse IFNB1<br>Forward: GCCTTTGCCATCCAAGAGATGC<br>Reverse: AACTGTCTGCTGGTGGAGTTC                                                                          | Eton Bioscience                                   | N/A         |
| Primer: Mouse CCL5<br>Forward: CCTGCTGCTTTGCCTACCTCTC<br>Reverse: ACACACTTGCGGTTCTTCGA                                                                            | Eton Bioscience                                   | N/A         |
| Primer: Mouse ZBP1<br>Forward: GATCTACCACTCACGTCAGGAAG<br>Reverse: GGCAATGGAGATGTGGCTGTTG                                                                         | Eton Bioscience                                   | N/A         |
| Primer: Human CCL5<br>Forward: CCTGCTGCTTTGCCTACATTGC<br>Reverse: ACACACTTGCGGTTCTTCGG                                                                            | Eton Bioscience                                   | N/A         |
| Primer: Human CXCL10<br>Forward: GGTGAGAAGAGATGTCTGAATCC<br>Reverse: GTCCATCCTTGAAGCACTGCA                                                                        | Eton Bioscience                                   | N/A         |
| Primer: Human IFIT1<br>Forward: GCCTTGCTGAAGTGTGGAGGAA<br>Reverse: ATCCAGGCGATAGGCAGAGATC                                                                         | Eton Bioscience                                   | N/A         |
| siGENOME Human MRE11 (4361) siRNA - SMARTpool                                                                                                                     | Horizon Discovery                                 | M-009271-01 |
| ON-TARGETplus Human RAD50 (10111) siRNA - SMARTpool                                                                                                               | Horizon Discovery                                 | L-005232-00 |

|                                                                                                                                                                                                                                                                             |                             |             |
|-----------------------------------------------------------------------------------------------------------------------------------------------------------------------------------------------------------------------------------------------------------------------------|-----------------------------|-------------|
| ON-TARGETplus Human NBN (4683) siRNA - SMARTpool                                                                                                                                                                                                                            | Horizon Discovery           | L-009641-00 |
| ON-TARGETplus Non-targeting Pool                                                                                                                                                                                                                                            | Horizon Discovery           | D-001810-10 |
| dsDNA : ISD90<br>Forward :<br>TACAGATCTACTAGTGATCTATGACTGATC<br>TGACATGATCTACATACAGATCTACTAGT<br>GATCTATGACTGATCTGTACATGATCTACA<br>Reverse :<br>TGTAGATCATGTACAGATCAGTCATAGATC<br>ACTAGTAGATCTGTATGTAGATCATGTACA<br>GATCAGTCATAGATCACTAGTAGATCTGTA                          | Integrated DNA Technologies | N/A         |
| dsDNA : Biotin-ISD90<br>Forward :<br>/5BiosG/TACAGATCTACTAGTGATCTATGAC<br>TGATCTGTACATGATCTACATACAGATCTA<br>CTAGTGATCTATGACTGATCTGTACATGAT<br>CTACA                                                                                                                         | Integrated DNA Technologies | N/A         |
| dsDNA : Alexa488-ISD90<br>Forward :<br>/5Alexa488/TACAGATCTACTAGTGATCTATG<br>ACTGATCTGTACATGATCTACATACAGATC<br>TACTAGTGATCTATGACTGATCTGTACATG<br>ATCTACA<br>Reverse :<br>TGTAGATCATGTACAGATCAGTCATAGATC<br>ACTAGTAGATCTGTATGTAGATCATGTACA<br>GATCAGTCATAGATCACTAGTAGATCTGTA | Integrated DNA Technologies | N/A         |
| dsDNA : Alexa594-ISD90<br>Forward :<br>/5Alexa594/TACAGATCTACTAGTGATCTATG<br>ACTGATCTGTACATGATCTACATACAGATC<br>TACTAGTGATCTATGACTGATCTGTACATG<br>ATCTACA<br>Reverse :<br>TGTAGATCATGTACAGATCAGTCATAGATC<br>ACTAGTAGATCTGTATGTAGATCATGTACA<br>GATCAGTCATAGATCACTAGTAGATCTGTA | Integrated DNA Technologies | N/A         |
| Alt-R® CRISPR-Cas9 crRNA for human MRE11<br>GCCGATGGTGAAGTGGTAAG                                                                                                                                                                                                            | Integrated DNA Technologies | N/A         |
| CRISPR gene knockout Kit V2 (human MB21D1)                                                                                                                                                                                                                                  | Synthego                    | N/A         |
| sgCon sequence for Gibson cloning<br>CTGATTTGAATAATGATGCC                                                                                                                                                                                                                   | Eton Bioscience             | N/A         |
| sgMRE11 sequence for Gibson cloning<br>TGGAGATCACTACTCGAGGC                                                                                                                                                                                                                 | Eton Bioscience             | N/A         |
| sgcGAS sequence for Gibson cloning<br>AAACGGCTCTCGTCTTAGAT                                                                                                                                                                                                                  | Eton Bioscience             | N/A         |
| sgSTING sequence for Gibson cloning<br>CGGCAGTTATTTTCGAGACTC                                                                                                                                                                                                                | Eton Bioscience             | N/A         |
| sgZBP1 #1 sequence for Gibson cloning<br>CAGGTGTTGAGCGATGACGG                                                                                                                                                                                                               | Eton Bioscience             | N/A         |
| sgZBP1 #2 sequence for Gibson cloning<br>ACCTCTTCCTTCACCTCGCG                                                                                                                                                                                                               | Eton Bioscience             | N/A         |

|                                                                                                                                                                         |                                 |         |
|-------------------------------------------------------------------------------------------------------------------------------------------------------------------------|---------------------------------|---------|
| sgZBP1 #3 sequence for Gibson cloning<br>ACGGCGGCCCTGTGAAGAT                                                                                                            | Eton Bioscience                 | N/A     |
| sgRIPK3 sequence for Gibson cloning<br>CCCGGACACGAAGTCCCAC                                                                                                              | Eton Bioscience                 | N/A     |
| sgMLKL sequence for Gibson cloning<br>CACACGGTTTTCTAGACGC                                                                                                               | Eton Bioscience                 | N/A     |
| sgATM sequence for Gibson cloning<br>AGACCTCTTGAATTATGTCA                                                                                                               | Eton Bioscience                 | N/A     |
| Primer for attB-cGAS-WT-attBForward :<br>GGGGACAAGTTTGTACAAAAAAGCAGGCTT<br>CATGCAGCCTTGGCACGGAAAG<br>Reverse :<br>GGGGACCACTTTGTACAAGAAAGCTGGGT<br>TTCAAATTCATCAAAACTGG | Integrated DNA Technologies     | N/A     |
| Primer for site-Directed mutagenesis (cGAS-<br>R255 -> A)<br>Forward :<br>ATTTAAAGCAAATCCGAAAGAAAATCCTCT<br>GA<br>Reverse :<br>GGATTTGCTTTAAATTTCAAAAGTAATATG<br>CA     | Integrated DNA Technologies     | N/A     |
| gBlocks™ Gene Fragments (BstBI-MRE11-<br>H129N-BstBI)                                                                                                                   | Integrated DNA Technologies     | N/A     |
| gBlocks™ Gene Fragments (BstBI-MRE11-<br>DB1Δ/DB2Δ-BstBI)                                                                                                               | Integrated DNA Technologies     | N/A     |
| <b>Recombinant DNA</b>                                                                                                                                                  |                                 |         |
| pLV-Cre_LKO1                                                                                                                                                            | Addgene                         | 25997   |
| LentiCRISPR-Cre-V2-LumiFluor                                                                                                                                            | Addgene                         | 52961   |
| psPAX2                                                                                                                                                                  | Addgene                         | 12260   |
| pMD2.G                                                                                                                                                                  | Addgene                         | 12259   |
| LentiCRISPR-Cre-V2-sgControl-LumiFluor                                                                                                                                  | This Paper                      | N/A     |
| LentiCRISPR-Cre-V2-sgMRE11-LumiFluor                                                                                                                                    | This Paper                      | N/A     |
| LentiCRISPR-Cre-V2-sgcGAS-LumiFluor                                                                                                                                     | This Paper                      | N/A     |
| LentiCRISPR-Cre-V2-sgSTING-LumiFluor                                                                                                                                    | This Paper                      | N/A     |
| LentiCRISPR-Cre-V2-sgZBP1-LumiFluor                                                                                                                                     | This Paper                      | N/A     |
| LentiCRISPR-Cre-V2-sgRIPK3-LumiFluor                                                                                                                                    | This Paper                      | N/A     |
| LentiCRISPR-Cre-V2-sgMLKL-LumiFluor                                                                                                                                     | This Paper                      | N/A     |
| LentiCRISPR-Cre-V2-sgATM-LumiFluor                                                                                                                                      | This Paper                      | N/A     |
| Lentiviral_pRRL-EF1a-GpNLuc                                                                                                                                             | Gift from Antonio Amelio, Ph.D  | N/A     |
| pBABE-Puro-Halo-MRE11-WT                                                                                                                                                | Gift from Eli Rothenberg at NYU | N/A     |
| pBABE-Puro-Halo                                                                                                                                                         | Gift from Eli Rothenberg at NYU | N/A     |
| pBABE-Puro-Halo-MRE11-H129N                                                                                                                                             | This Paper                      | N/A     |
| pBABE-Puro-Halo-MRE11-DB1Δ/DB2Δ                                                                                                                                         | This Paper                      | N/A     |
| pTRIP-CMV-tagRFP-FLAG-cGAS                                                                                                                                              | Addgene                         | #86676  |
| pTRIP-CMV-GFP-FLAG-cGAS                                                                                                                                                 | Addgene                         | #86675  |
| pUMVC                                                                                                                                                                   | Addgene                         | #8449   |
| pCMV-VSV-G                                                                                                                                                              | Addgene                         | #8454   |
| pLV-PCNA-mCherry                                                                                                                                                        | From Jeremy Purvis at UNC       | N/A     |
| Human MRE11-FLAG (pTP813)                                                                                                                                               | Addgene                         | #113308 |
| RAD50-6xHIS (pTP2620)                                                                                                                                                   | Addgene                         | #113311 |
| NBS1-FLAG (pTP288)                                                                                                                                                      | Addgene                         | #113460 |



|                                              |                                                                                                                                                                                                                                                   |                                                                                                                                                   |
|----------------------------------------------|---------------------------------------------------------------------------------------------------------------------------------------------------------------------------------------------------------------------------------------------------|---------------------------------------------------------------------------------------------------------------------------------------------------|
| pET-6xHis-Sumo-mcGAS                         | From Pingwei Li @ Texas A&M                                                                                                                                                                                                                       | N/A                                                                                                                                               |
| pET-6xHis-Sumo-hcGAS                         | From Pingwei Li @ Texas A&M                                                                                                                                                                                                                       | N/A                                                                                                                                               |
| pBig1a-hRAD50-hMRE11N2xSTR                   | This paper                                                                                                                                                                                                                                        | N/A                                                                                                                                               |
| pBig1a-hRAD50-hMRE11(H129N)N2xSTR            | This paper                                                                                                                                                                                                                                        | N/A                                                                                                                                               |
| pDONR™221                                    | Thermo Fisher Scientific                                                                                                                                                                                                                          | 12536017                                                                                                                                          |
| PB-TA-ERP2                                   | Addgene                                                                                                                                                                                                                                           | #80477                                                                                                                                            |
| PB-TA-ERP2-hcGAS-WT                          | This paper                                                                                                                                                                                                                                        | N/A                                                                                                                                               |
| PB-TA-ERP2-hcGAS-R255A                       | This paper                                                                                                                                                                                                                                        | N/A                                                                                                                                               |
| Super PiggyBac Transposase Expression Vector | System Biosciences                                                                                                                                                                                                                                | PB210PA-1                                                                                                                                         |
| <b>Software and Algorithms</b>               |                                                                                                                                                                                                                                                   |                                                                                                                                                   |
| BowTie2 v2.3.4.1                             | Langmead, B. and S. L. Salzberg (2012). "Fast gapped-read alignment with Bowtie 2." <i>Nat Methods</i> <b>9</b> (4): 357-359.                                                                                                                     | <a href="https://sourceforge.net/projects/bowtie-bio/files/bowtie2/2.3.4.1">https://sourceforge.net/projects/bowtie-bio/files/bowtie2/2.3.4.1</a> |
| Samtools v1.6.0                              | Li, H., B. Handsaker, A. Wysoker, T. Fennell, J. Ruan, N. Homer, G. Marth, G. Abecasis, R. Durbin and S. Genome Project Data Processing (2009). "The Sequence Alignment/Map format and SAMtools." <i>Bioinformatics</i> <b>25</b> (16): 2078-2079 | <a href="http://www.htslib.org/download/">http://www.htslib.org/download/</a>                                                                     |
| BedTools v2.26.0                             | Quinlan, A. R. and I. M. Hall (2010). "BEDTools: a flexible suite of utilities for comparing genomic features." <i>Bioinformatics</i> <b>26</b> (6): 841-842.                                                                                     | <a href="https://github.com/arq5x/bedtools2">https://github.com/arq5x/bedtools2</a>                                                               |
| Python ≥v3.5                                 | G. van Rossum, Python tutorial, Technical Report CS-R9526, Centrum voor Wiskunde en Informatica (CWI), Amsterdam, May 1995                                                                                                                        | <a href="https://www.python.org/">https://www.python.org/</a>                                                                                     |
| Ginkgo                                       | Garvin, T., R. Aboukhalil, J. Kendall, T. Baslan, G. S. Atwal, J. Hicks, M. Wigler and M. C. Schatz (2015). "Interactive analysis and assessment of single-cell copy-number variations." <i>Nat Methods</i> <b>12</b> (11): 1058-1060.            | <a href="http://qb.cshl.edu/ginkgo/?q=">http://qb.cshl.edu/ginkgo/?q=</a>                                                                         |
| Vulur algorithm                              | This paper                                                                                                                                                                                                                                        | GitHub                                                                                                                                            |
| GNU Gzip v1.5                                | N.A.                                                                                                                                                                                                                                              | <a href="https://www.gnu.org/software/gzip/">https://www.gnu.org/software/gzip/</a>                                                               |
| Graphpad Prism v7, v8 and v9                 | GraphPad Prism Inc                                                                                                                                                                                                                                | <a href="https://www.graphpad.com/">https://www.graphpad.com/</a>                                                                                 |
| Python-Levenshtein Library v0.12.0           | N.A.                                                                                                                                                                                                                                              | <a href="https://github.com/ztane/python-Levenshtein">https://github.com/ztane/python-Levenshtein</a>                                             |

|                                                                                                                 |                                                                                                                                                                                                                                  |                                                                                                                                                                                   |
|-----------------------------------------------------------------------------------------------------------------|----------------------------------------------------------------------------------------------------------------------------------------------------------------------------------------------------------------------------------|-----------------------------------------------------------------------------------------------------------------------------------------------------------------------------------|
| BioEdit Sequence Alignment Editor                                                                               | Hall, T.A. 1999. BioEdit: a user-friendly biological sequence alignment editor and analysis program for Windows 95/98/NT. Nucl. Acids. Symp. Ser. 41:95-98.                                                                      | <a href="http://www.mbio.ncsu.edu/BioEdit/bioedit.html">http://www.mbio.ncsu.edu/BioEdit/bioedit.html</a>                                                                         |
| Fiji ImageJ 1.53c<br>Schneider et al. 2012<br><a href="https://imagej.nih.gov/ij">https://imagej.nih.gov/ij</a> | Schindelin, J.; Arganda-Carreras, I. & Frise, E. et al. (2012), " <i>Fiji: an open-source platform for biological-image analysis</i> ", Nature methods 9(7): 676-682, PMID 22743772, doi:10.1038/nmeth.2019 (on Google Scholar). | <a href="https://imagej.net/Fiji/#Downloads">https://imagej.net/Fiji/#Downloads</a>                                                                                               |
| SnapGene software v4.3.4                                                                                        | GSL Biotech                                                                                                                                                                                                                      | <a href="https://www.snapgene.com">https://www.snapgene.com</a>                                                                                                                   |
| ZEN 2011 microscope software                                                                                    | ZEISS                                                                                                                                                                                                                            | <a href="https://www.Zeiss.com/corporate/int/home.html">https://www.Zeiss.com/corporate/int/home.html</a>                                                                         |
| ImageJ (v. 2.0.0-rc-43/1.51k)                                                                                   | NIH                                                                                                                                                                                                                              | <a href="https://imagej.nih.gov/ij/index.html">https://imagej.nih.gov/ij/index.html</a>                                                                                           |
| NIS Elements AR software v.4.50                                                                                 | Nikon                                                                                                                                                                                                                            | <a href="https://www.nikon.com/products/microscope-solutions/lineup/img_soft/nis-elements/">https://www.nikon.com/products/microscope-solutions/lineup/img_soft/nis-elements/</a> |
| NIS-Elements Viewer v.4.2                                                                                       | Nikon                                                                                                                                                                                                                            | <a href="https://www.nikon.com/products/microscope-solutions/lineup/img_soft/nis-elements/">https://www.nikon.com/products/microscope-solutions/lineup/img_soft/nis-elements/</a> |
| <b>Other</b>                                                                                                    |                                                                                                                                                                                                                                  |                                                                                                                                                                                   |
| Mouse Reference Sequence GRCm38                                                                                 | www.Ensembl.org                                                                                                                                                                                                                  | <a href="https://www.ensembl.org/Mus_musculus/Info/Index">https://www.ensembl.org/Mus_musculus/Info/Index</a>                                                                     |
| Microsatellites, CpG Islands, Simple Repeats, SINE Elements, LINE Elements, LTR                                 | UCSC Genome Browser                                                                                                                                                                                                              | <a href="https://genome.ucsc.edu/cgi-bin/hgTables">https://genome.ucsc.edu/cgi-bin/hgTables</a>                                                                                   |
| Genes                                                                                                           | www.Ensembl.org                                                                                                                                                                                                                  | Ensembl v91                                                                                                                                                                       |
| Oregon-green hNCP                                                                                               | This paper                                                                                                                                                                                                                       | N/A                                                                                                                                                                               |
| hNCP                                                                                                            | This paper                                                                                                                                                                                                                       | N/A                                                                                                                                                                               |
| Trans-Blot                                                                                                      | Bio-Rad                                                                                                                                                                                                                          | 1704150                                                                                                                                                                           |
| Qubit 3.0 Fluorometer                                                                                           | Thermo Fisher Scientific                                                                                                                                                                                                         | Q33216                                                                                                                                                                            |
| RS2000 X-irradiator                                                                                             | Rad Source                                                                                                                                                                                                                       | 020712                                                                                                                                                                            |
| Luminometer                                                                                                     | SpectraMax i3x                                                                                                                                                                                                                   | N/A                                                                                                                                                                               |
| Neon™ Transfection System                                                                                       | Invitrogen                                                                                                                                                                                                                       | MPK5000                                                                                                                                                                           |
| Neon™ Transfection System 10 µL Kit                                                                             | Invitrogen                                                                                                                                                                                                                       | MPK1025                                                                                                                                                                           |
| Typhoon FLA-9500 imager                                                                                         | GE Healthcare                                                                                                                                                                                                                    | N/A                                                                                                                                                                               |
| ANTI-FLAG® M2 Affinity Gel                                                                                      | Sigma-Aldrich                                                                                                                                                                                                                    | A2220                                                                                                                                                                             |
| Matrigel® Matrix                                                                                                | Corning                                                                                                                                                                                                                          | 356231                                                                                                                                                                            |
| Source Q resin                                                                                                  | GE healthcare                                                                                                                                                                                                                    | 17094705                                                                                                                                                                          |
| Superose 6 Increase 10/300 GL;<br>Polyethersulfone/Pore size : 50,000 MWCO                                      | Vivascience                                                                                                                                                                                                                      | 29-0915-96                                                                                                                                                                        |
| Zeba Spin desalting column                                                                                      | Thermo Fisher Scientific                                                                                                                                                                                                         | 89878                                                                                                                                                                             |

|                                                    |                          |            |
|----------------------------------------------------|--------------------------|------------|
| 5-(and-6-)-Carboxyrhodamine 6G, succinimidyl ester | Thermo Fisher Scientific | C6157      |
| Strep-tactin XT                                    | IBA Lifesciences         | 2-4030-010 |
| Superdex 200 increase columns                      | GE healthcare            | 28990944   |
| Talon resin                                        | Clontech                 | 635504     |
| Source S resin                                     | Ge healthcare            | 17094405   |

### **CONTACT FOR REAGENT AND RESOURCE SHARING**

Further information and requests for resources and reagents should be directed to and will be fulfilled by the Lead Contact, Dr. Gaorav Gupta: [gaorav\\_gupta@med.unc.edu](mailto:gaorav_gupta@med.unc.edu).
